# Supplementary material for: Inactivation of the Response Regulator AgrA Has a Pleiotropic Effect on Biofilm Formation, Pathogenesis and Stress Response in Staphylococcus lugdunensis
Source: PubMed Central journal article supplement (PMC8826819; doi:10.1128/spectrum.01598-21), 2022-02-09
Supplement: spectrum01598-21_supp_4_seq17.pdf [file spectrum01598-21_supp_4_seq17.pdf]

## SUPPLEMENTAL MATERIAL

### LEGENDS

**TABLE S1** List of proteins significantly upregulated and downregulated of growing cell (OD<sub>600</sub> of 1) of *S. lugdunensis* N920143 compared to  $\Delta agrA$  mutant.

**TABLE S2** List of all genes differentially expressed in *S. lugdunensis* N920143 cells compared to  $\Delta agrA$  mutant cells (OD<sub>600</sub> of 1).

**TABLE S3** Summary of RNAseq results of the samples of *S. lugdunensis* N920143 and  $\Delta agrA$  mutant.

**TABLE S4** List of oligonucleotides used in this study.

**FIG S1** Complementation experiments. **A** growth curves in BHI with 10% NaCl of *S. lugdunensis*  $\Delta agrA$  mutant containing the empty plasmid pRB473 (continuous line), and  $\Delta agrA$  mutant with the plasmid pRB473-*agr* (complemented strain) (dotted line). **B** growth curves in BHI with 0.4 mM H<sub>2</sub>O<sub>2</sub> of *S. lugdunensis*  $\Delta agrA$  containing the empty plasmid pRB473 (continuous line), and  $\Delta agrA$  mutant with the plasmid pRB473-*agr* (complemented strain) (dotted line). **C** Transcriptional changes (Log<sub>2</sub>FC) of RNAIII, *crtM*, *crtN*, *slushABC*, and *SLUG\_07290* in the  $\Delta agrA$  mutant compared to the wild type strain (black bars) and in complemented strain ( $\Delta agrA$  mutant with the plasmid pRB473-*agr*) compared to the  $\Delta agrA$  strain (white bars). Asterisks indicate *p* values < 0.05.

**FIG S2** Volcano plots of proteins differentially expressed of growing cell (OD<sub>600</sub> of 1) of *S. lugdunensis* N920143 compared to  $\Delta agrA$  mutant.

**FIG S3** Volcano plots of genes differentially expressed of growing cell (OD<sub>600</sub> of 1) of *S. lugdunensis* N920143 compared to  $\Delta agrA$  mutant.

**TABLE S3** Summary of RNAseq results of the samples of *S. lugdunensis* N920143 and  $\Delta$ *agrA* mutant.

|                                               | <i>S. lugdunensis</i> N920143 wild type |                       |                       |                       | <i>S. lugdunensis</i> N920143 <i>agr</i> deleted |                       |                       |                       |
|-----------------------------------------------|-----------------------------------------|-----------------------|-----------------------|-----------------------|--------------------------------------------------|-----------------------|-----------------------|-----------------------|
|                                               | 1                                       | 2                     | 3                     | 4                     | 1                                                | 2                     | 3                     | 4                     |
| <b>Overall results</b>                        |                                         |                       |                       |                       |                                                  |                       |                       |                       |
| Number of input reads                         | 29827506                                | 33177543              | 34470980              | 31888778              | 32495196                                         | 31285384              | 29215079              | 31391569              |
| Average input read length                     | 50                                      | 50                    | 50                    | 50                    | 50                                               | 50                    | 50                    | 50                    |
| Mean Quality                                  | 39.8                                    | 39.81                 | 39.83                 | 39.8                  | 39.42                                            | 39.43                 | 39.40                 | 39.44                 |
| (%) > Q30                                     | 98.46                                   | 98.5                  | 98.52                 | 98.48                 | 99.57                                            | 99.61                 | 99.56                 | 99.60                 |
| <b>Unique reads</b>                           |                                         |                       |                       |                       |                                                  |                       |                       |                       |
| Uniquely mapped reads number (%)              | 28976728<br>(97.15 %)                   | 32320911<br>(97.42 %) | 33762650<br>(97.95 %) | 31205204<br>(97.86 %) | 31426765<br>(96.71 %)                            | 30426886<br>(97.26 %) | 28239556<br>(96.66 %) | 30783448<br>(98.06 %) |
| Average mapped length                         | 49.94                                   | 49.94                 | 49.94                 | 49.94                 | 49.94                                            | 49.95                 | 49.94                 | 49.95                 |
| <b>Multi-mapping reads</b>                    |                                         |                       |                       |                       |                                                  |                       |                       |                       |
| Number of reads mapped to multiple loci (%)   | 594203<br>(1.99 %)                      | 492013<br>(1.48 %)    | 410947<br>(1.19 %)    | 518997<br>(1.63 %)    | 968870<br>(2.98 %)                               | 550622<br>(1.76 %)    | 648812<br>(2.22 %)    | 485314<br>(1.55 %)    |
| Number of reads mapped to too many loci       | 31                                      | 22                    | 12                    | 14                    | 24                                               | 11                    | 17                    | 9                     |
| <b>Unmapped reads</b>                         |                                         |                       |                       |                       |                                                  |                       |                       |                       |
| Number of reads unmapped: too many mismatches | 0                                       | 0                     | 0                     | 0                     | 0                                                | 0                     | 0                     | 0                     |
| Number of reads unmapped: too short (%)       | 256245<br>(0.86 %)                      | 364066<br>(1.10 %)    | 297024<br>(0.86 %)    | 164342<br>(0.52 %)    | 99284<br>(0.31 %)                                | 307564<br>(0.98 %)    | 326342<br>(1.12 %)    | 122274<br>(0.39 %)    |
| Number of reads unmapped: other               | 299                                     | 531                   | 347                   | 221                   | 253                                              | 301                   | 353                   | 524                   |

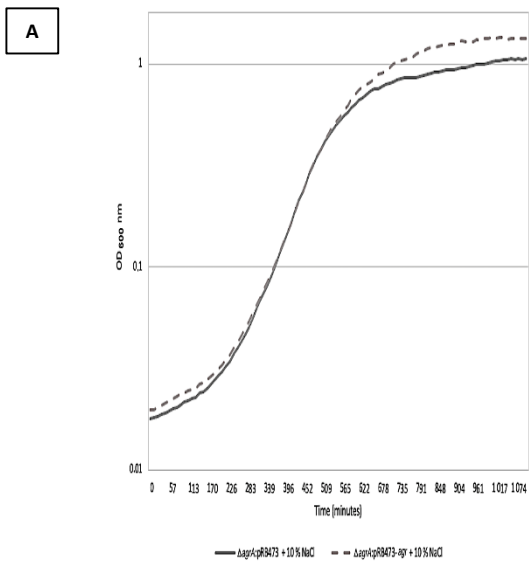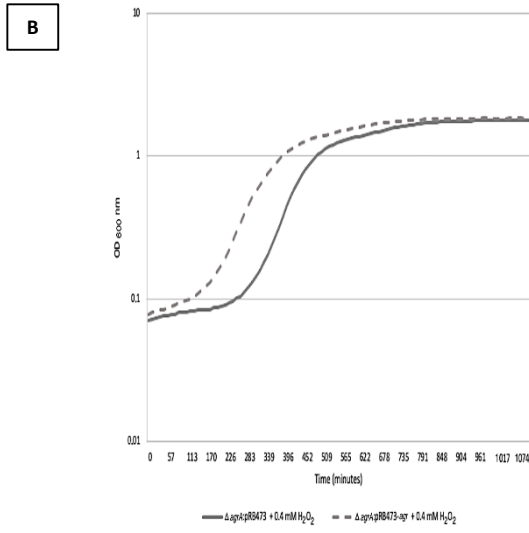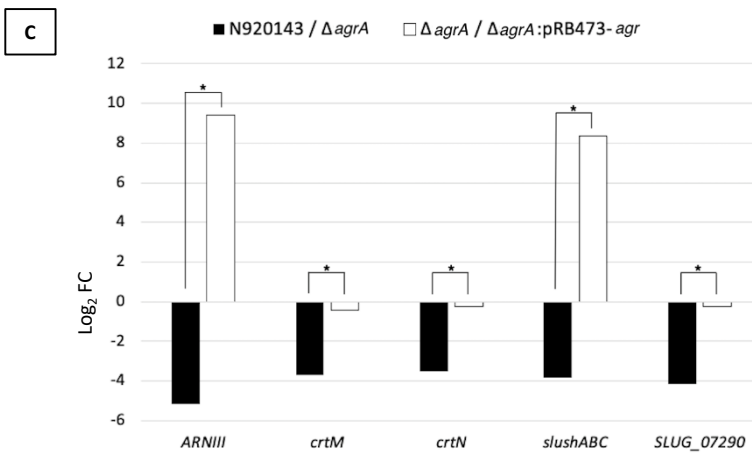

FIG S1

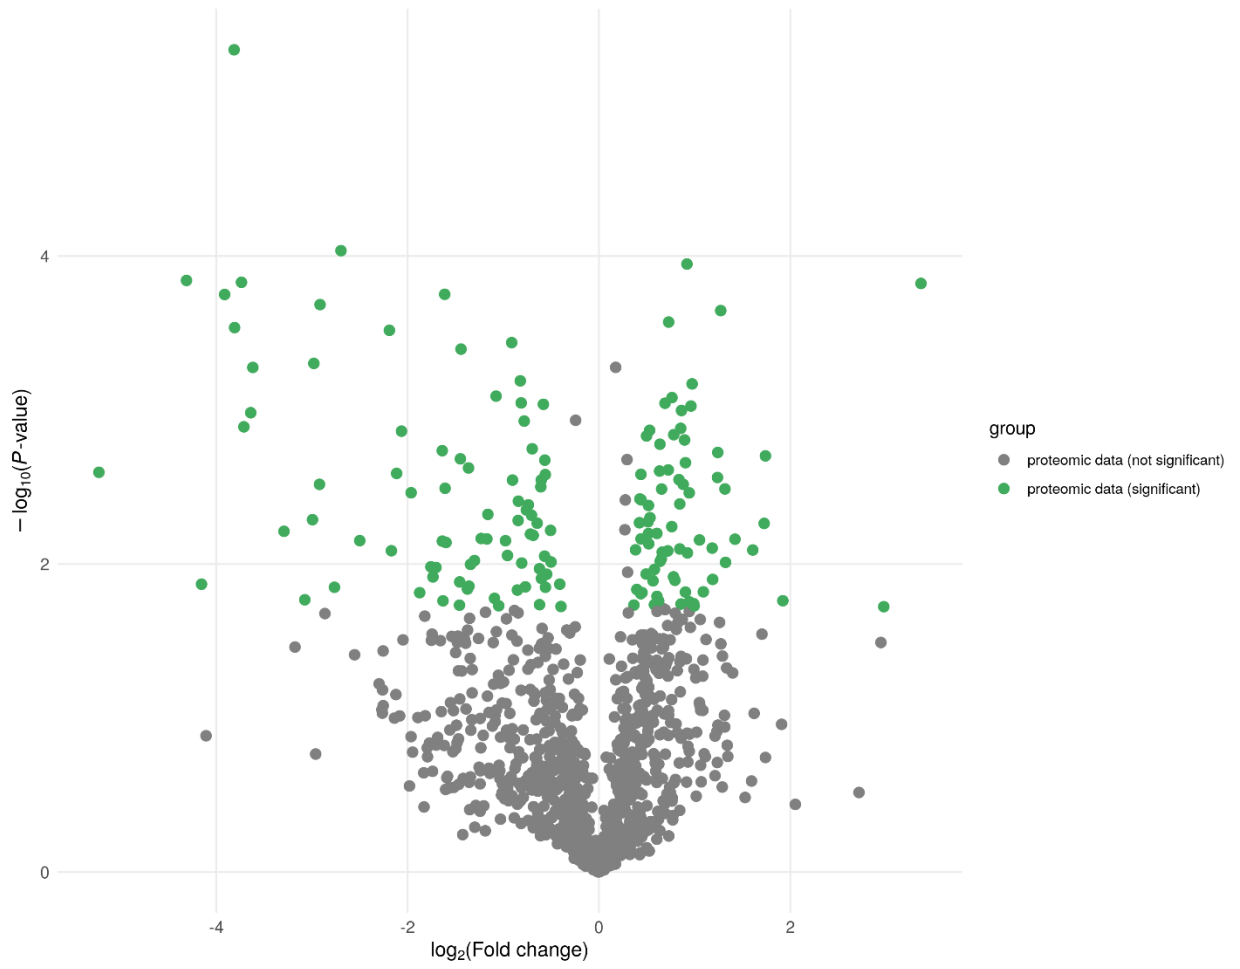

**FIG S2**

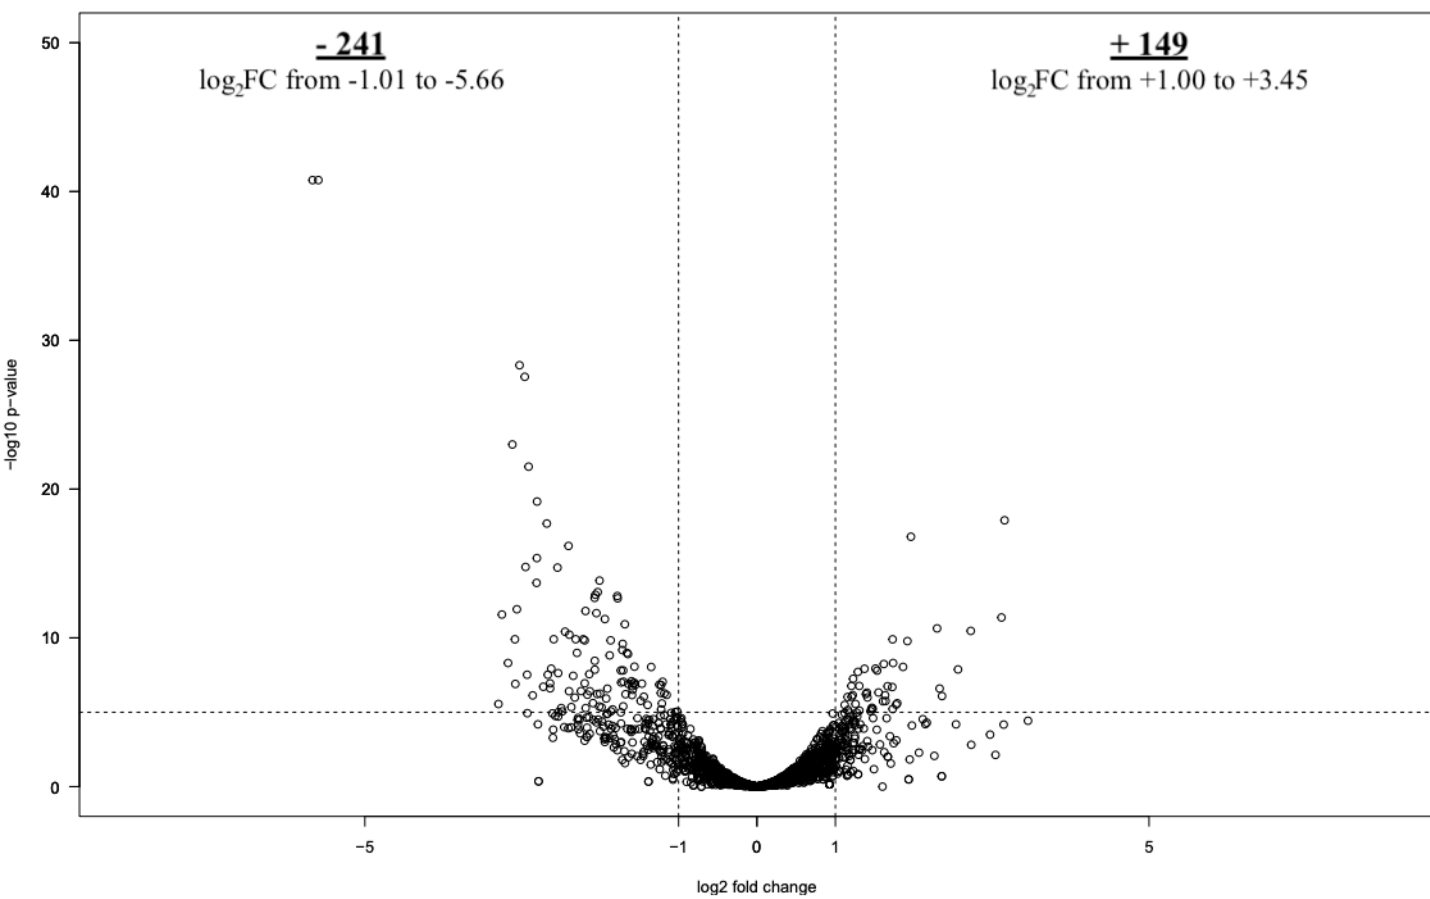

**FIG S3**
